# Supplementary material for: Synergistic effect of scattered rare metals on Pt/CeO2 for propane oxidative dehydrogenation with CO2
Source: Royal Society of Chemistry journal article supplement (doi:10.1039/d4ra08481k), 2025-01-01
Supplement: d4ra08481k1.pdf [file d4ra08481k1.pdf]

## Supporting Information for

### Synergistic Effect of Scattered Rare Metals on Pt/CeO<sub>2</sub> for Propane

#### Oxidative Dehydrogenation with CO<sub>2</sub>

Jiulong Wang<sup>a</sup>, Fang Wang<sup>a</sup>, Longyang Li<sup>a</sup>, Weihao Zhao<sup>a</sup>, Shiyuan Wang<sup>a</sup>, Zelin Ma<sup>a</sup>, Yan Kong<sup>b</sup>, Yazhou Shuang<sup>a</sup>, Weiwei Xia<sup>a</sup>, Jie Jian<sup>a</sup>, Pengfei Guo<sup>a</sup>, Hongqiang Wang<sup>a\*</sup>

<sup>a</sup> State Key Laboratory of Solidification Processing, Center for Nano Energy Materials, School of Materials Science and Engineering, Northwestern Polytechnical University and Shaanxi Joint Laboratory of Graphene (NPU), Xi'an 710072, P. R. China.

<sup>b</sup> Ministry of Education Engineering Research Center of Water Resource Comprehensive Utilization in Cold and Arid Regions, School of Environmental and Municipal Engineering, Lanzhou Jiaotong University, Lanzhou 730070, P. R. China.

#### Experimental Materials

Ce (NH<sub>4</sub>)(NO<sub>3</sub>)<sub>6</sub>, Urea, H<sub>2</sub>PtCl<sub>6</sub>·6H<sub>2</sub>O (Pt > 37.5%), SnCl<sub>2</sub>·2H<sub>2</sub>O, Ga(NO<sub>3</sub>)<sub>3</sub>·xH<sub>2</sub>O, InCl<sub>3</sub>·4H<sub>2</sub>O purchased from Shanghai Macklin Biochemical Co. Ltd. Ethanol was purchased from Sinopharm Chemical Reagent Co., Ltd. The ultrapure water (>18.2 MΩ) used in the experiments was homemade from a laboratory-configured water purifier.

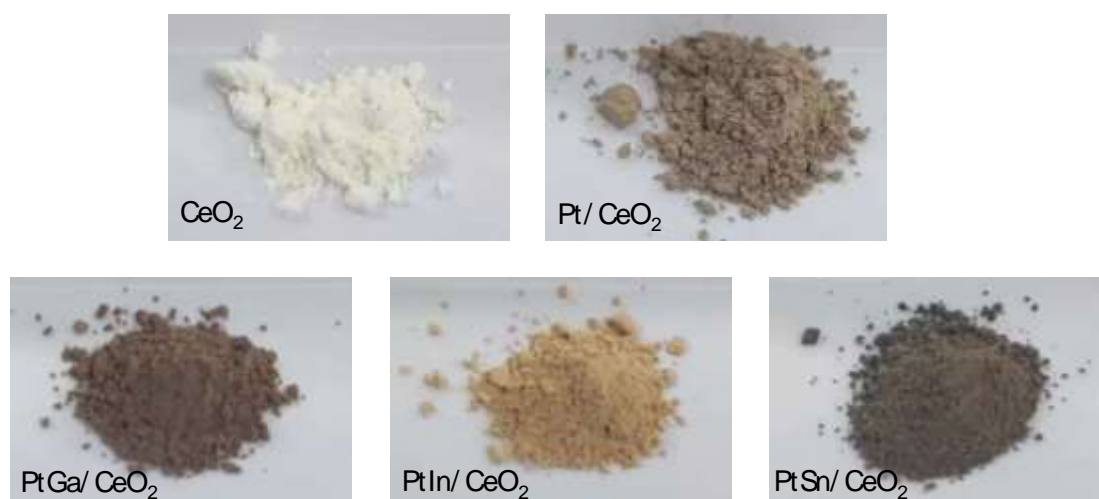

**Figure S1.** Physical diagram of catalysts.

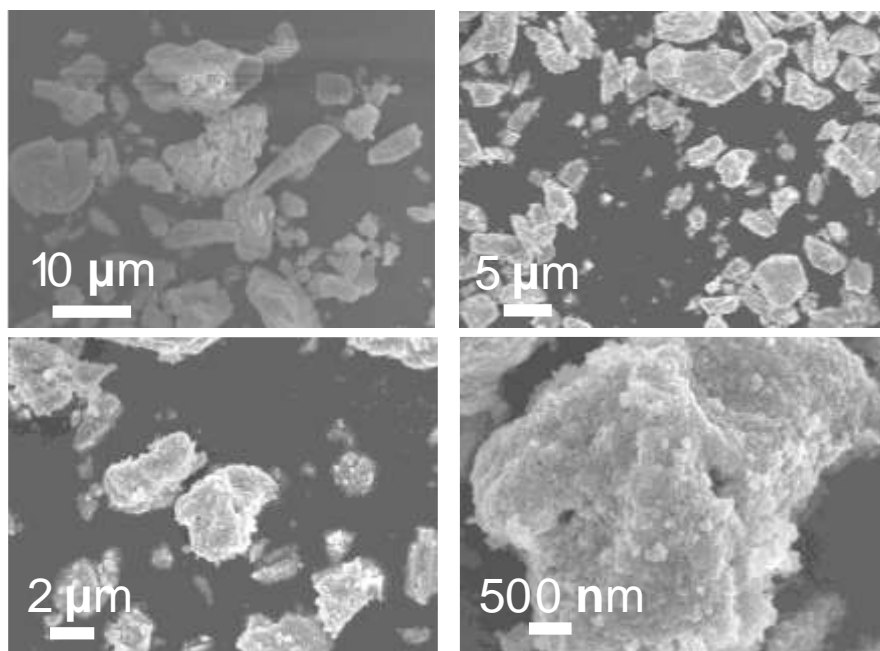

Figure S2. SEM images of PtGa/CeO<sub>2</sub>.

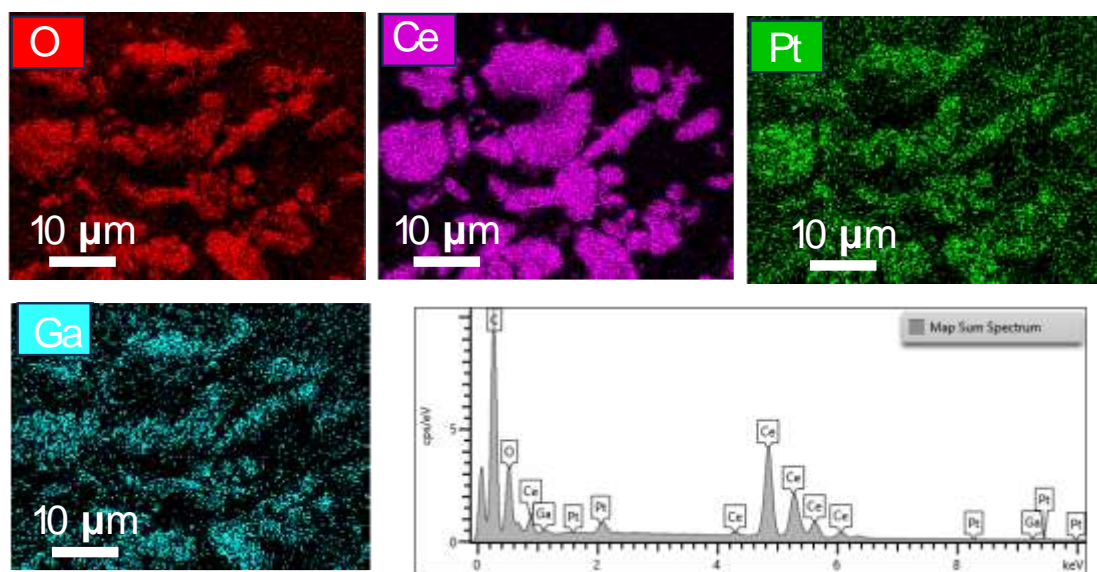

Figure S3. SEM-EDS elemental mappings of PtGa/CeO<sub>2</sub>.

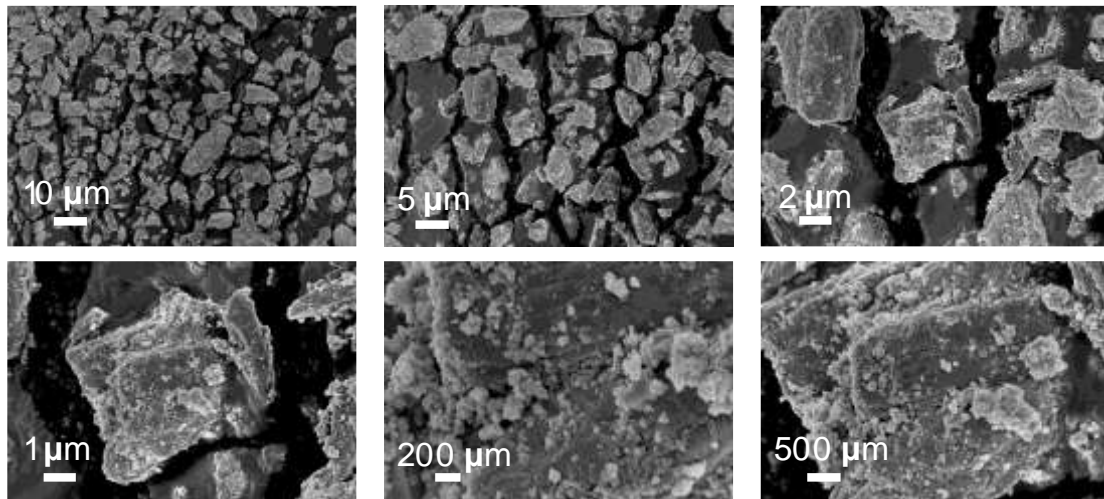

**Figure S4.** SEM images of PtIn/CeO<sub>2</sub>.

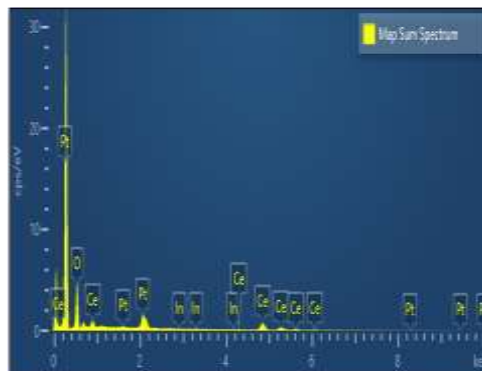

**Figure S5.** Map sum spectrum of elements of PtIn/CeO<sub>2</sub>.

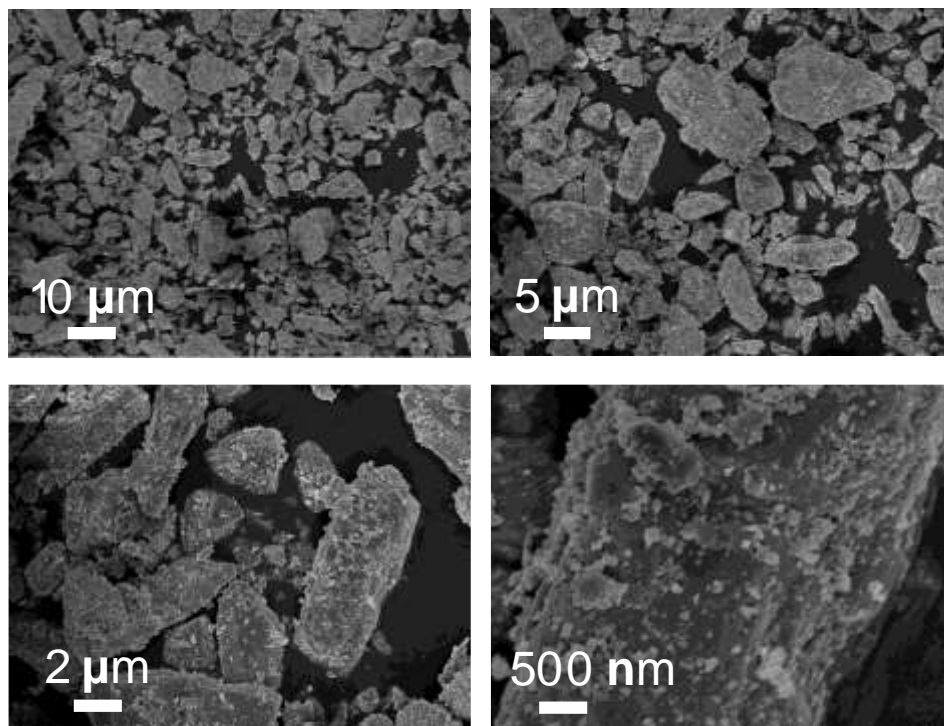

**Figure S6.** SEM iamges of PtSn/CeO<sub>2</sub>.

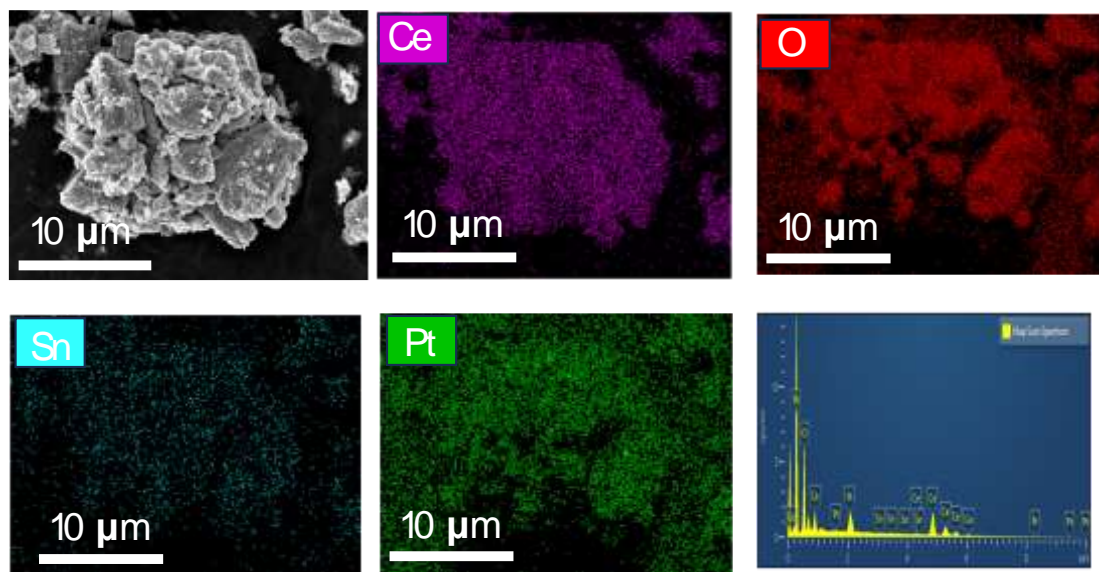

**Figure S7.** SEM-EDS elemental mappings of PtSn/CeO<sub>2</sub>.

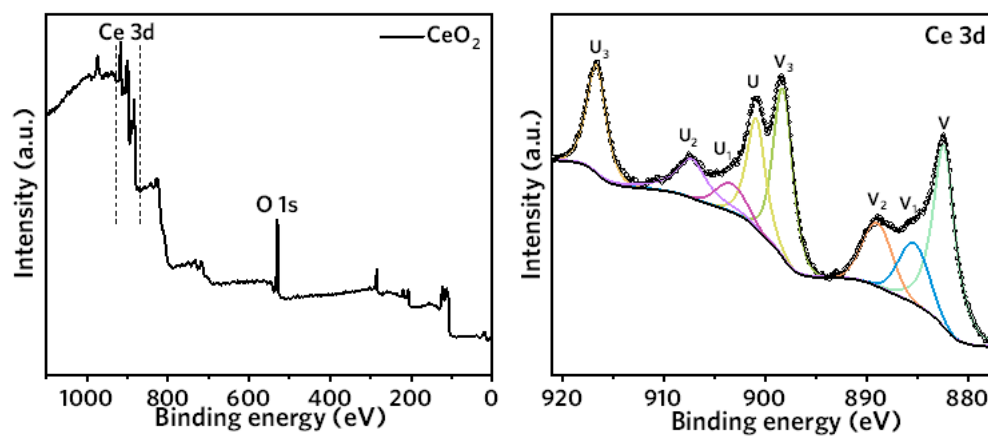

**Figure S8.** Wide spectra and Ce 3d high-resolution XPS spectra of CeO<sub>2</sub>.

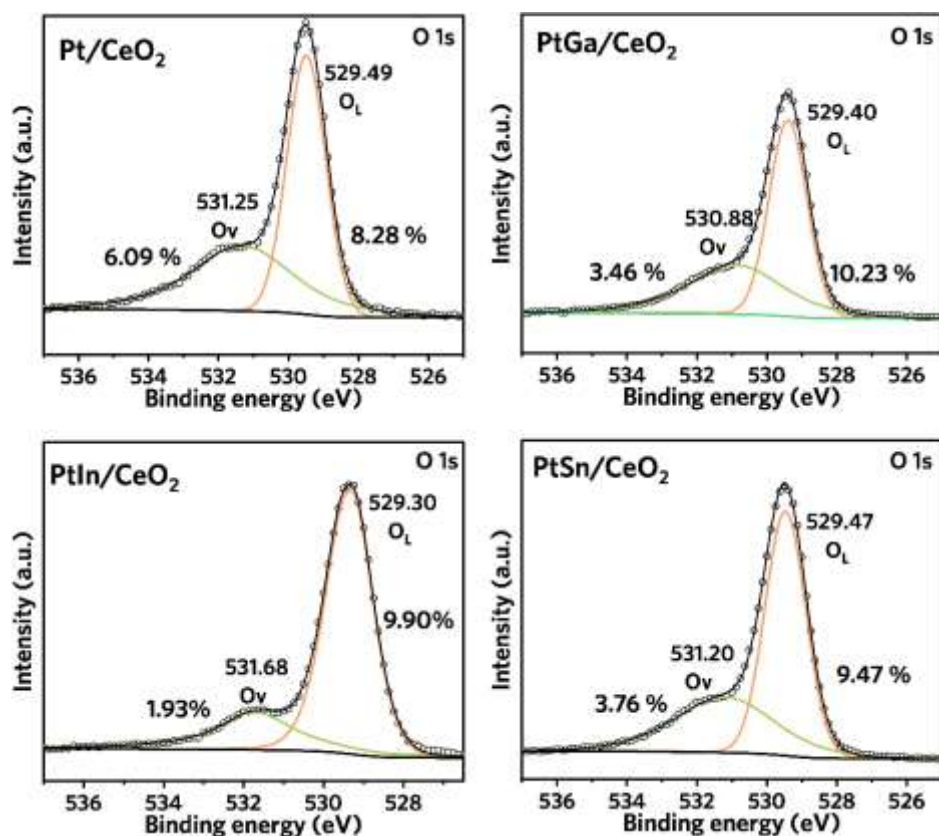

Figure S9. O 1s high-resolution XPS spectra of Pt/CeO<sub>2</sub>, PtGa/CeO<sub>2</sub>, PtIn/CeO<sub>2</sub> and PtSn/CeO<sub>2</sub>.

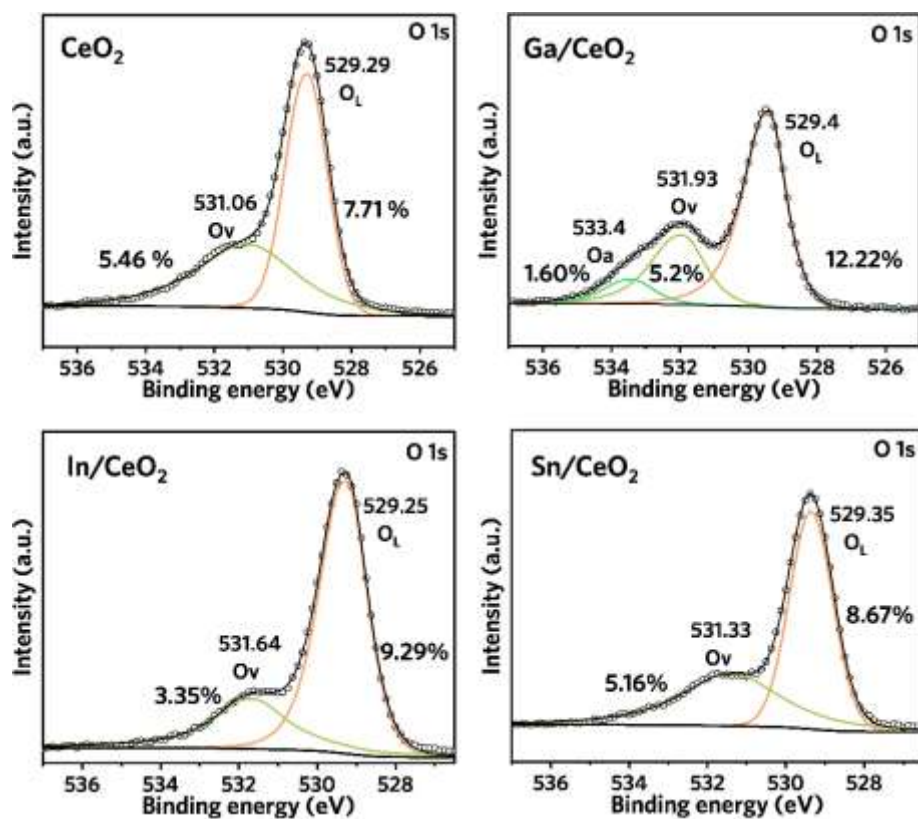

Figure S10. O 1s high-resolution XPS spectra of CeO<sub>2</sub>, Ga/CeO<sub>2</sub>, In/CeO<sub>2</sub> and Sn/CeO<sub>2</sub>.

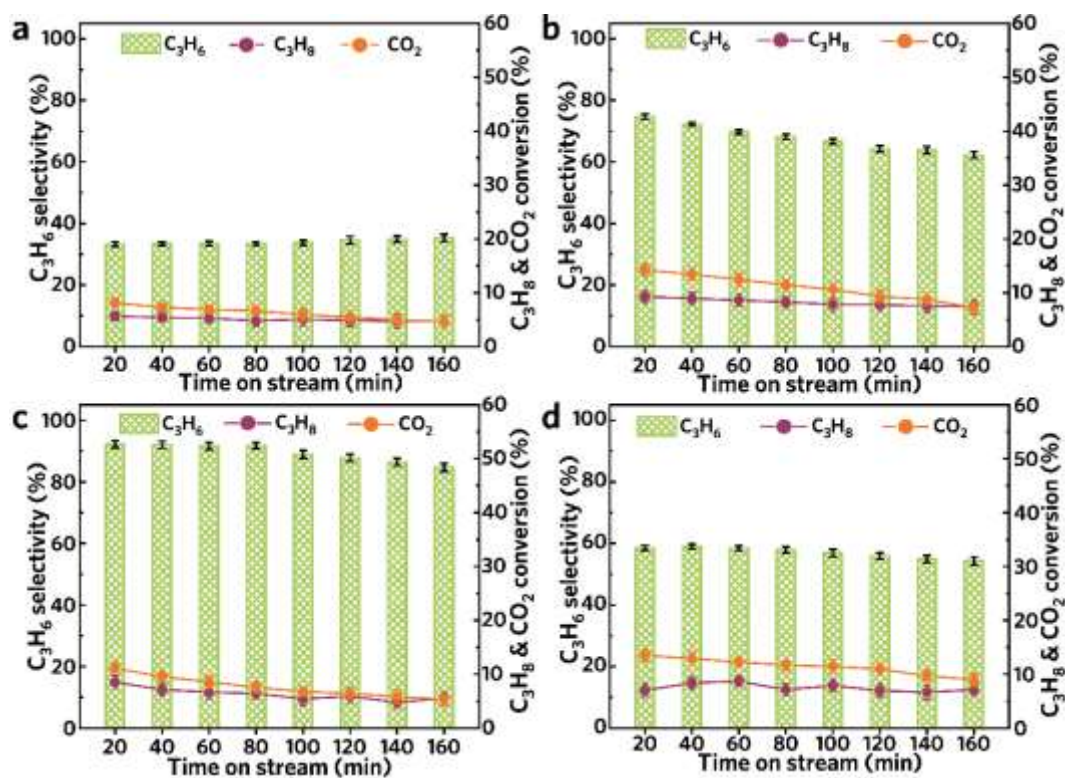

**Figure S11.** (a-d) The CO<sub>2</sub>-ODP performance of CeO<sub>2</sub>, Ga/CeO<sub>2</sub>, Sn/CeO<sub>2</sub> and In/CeO<sub>2</sub>, respectively.

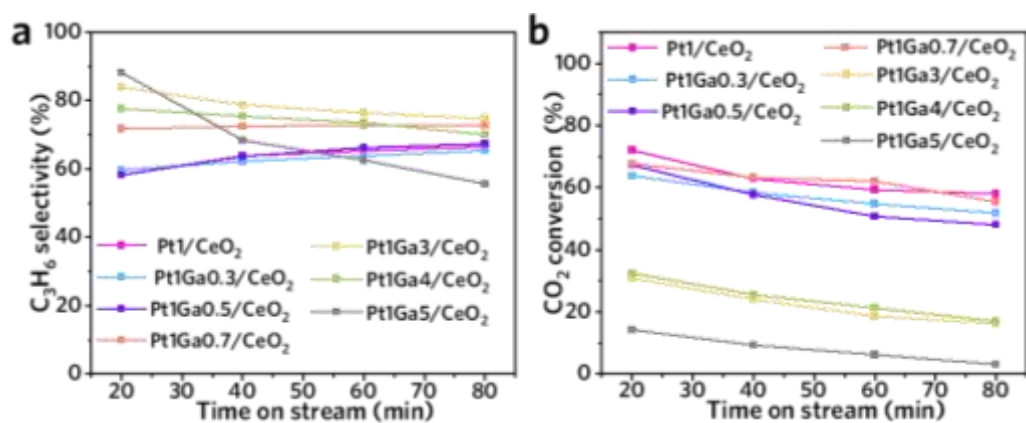

**Figure S12.** (a-b) The selectivity of C<sub>3</sub>H<sub>6</sub> and conversion of CO<sub>2</sub> with time varies over Pt<sub>1</sub>Ga<sub>x</sub>/CeO<sub>2</sub>.

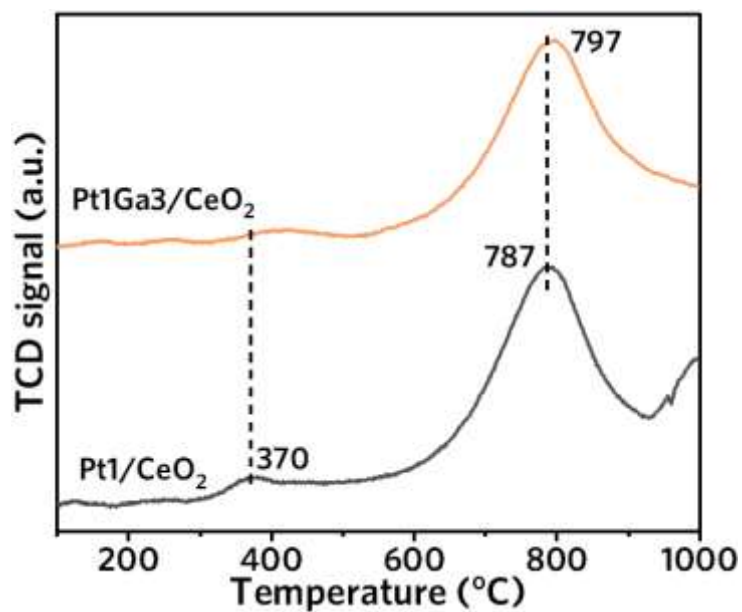

Figure S13. H<sub>2</sub>-TPR profiles of Pt1/CeO<sub>2</sub> and Pt1Ga<sub>3</sub>/CeO<sub>2</sub>.

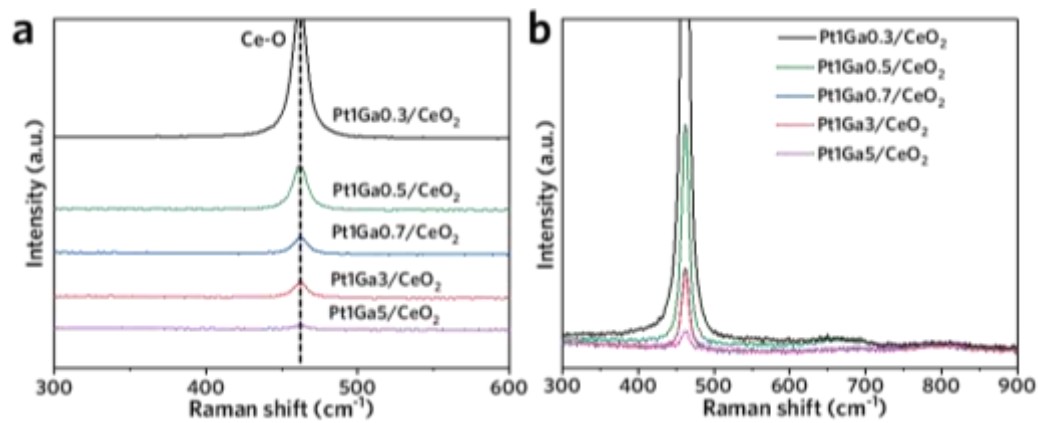

Figure S14. (a-b) Raman spectra at different regions of resh Pt1Ga<sub>x</sub>/CeO<sub>2</sub>.

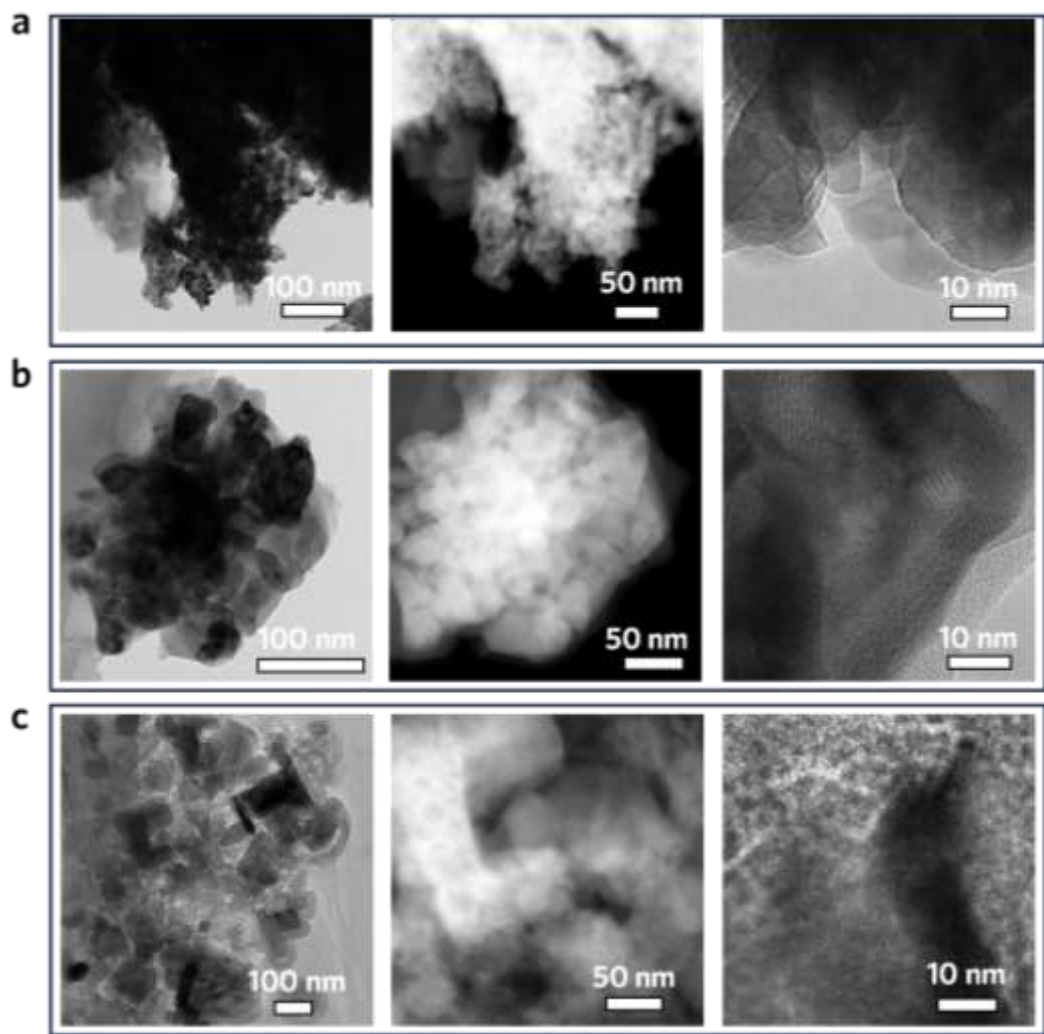

**Figure S15.** (a-c) TEM and HRTEM images of Pt1Ga0.5/CeO<sub>2</sub>, Pt1Ga0.7/CeO<sub>2</sub> and Pt1Ga5/CeO<sub>2</sub>, respectively.

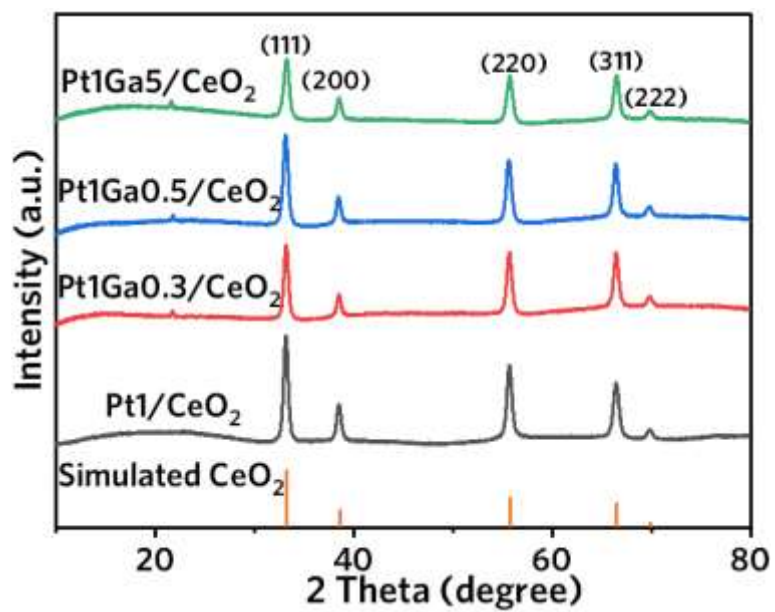

**Figure S16.** XRD spectra fresh Pt1Gax/CeO<sub>2</sub>.



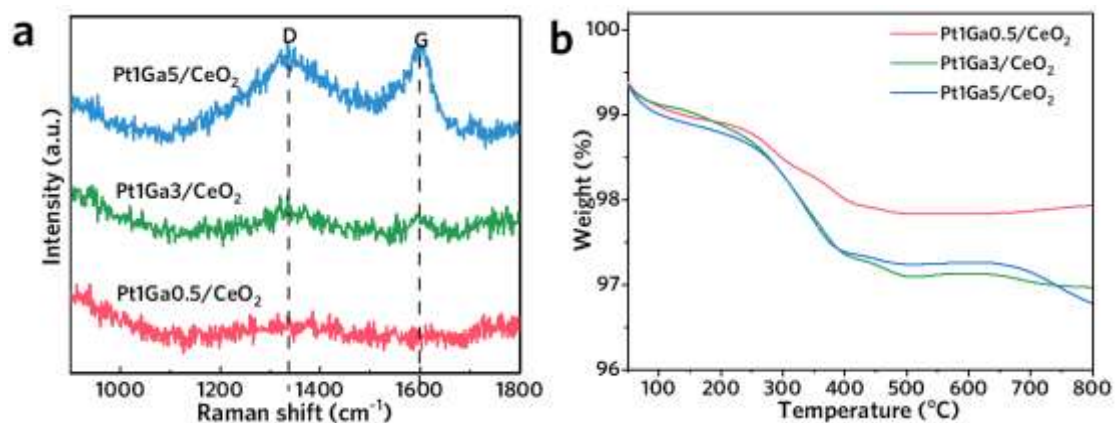

**Figure S17.** The Raman spectra and TG -DSC profiles of spent Pt1Gax/CeO<sub>2</sub> catalysts after CO<sub>2</sub>-ODP (TOS of 80 min).

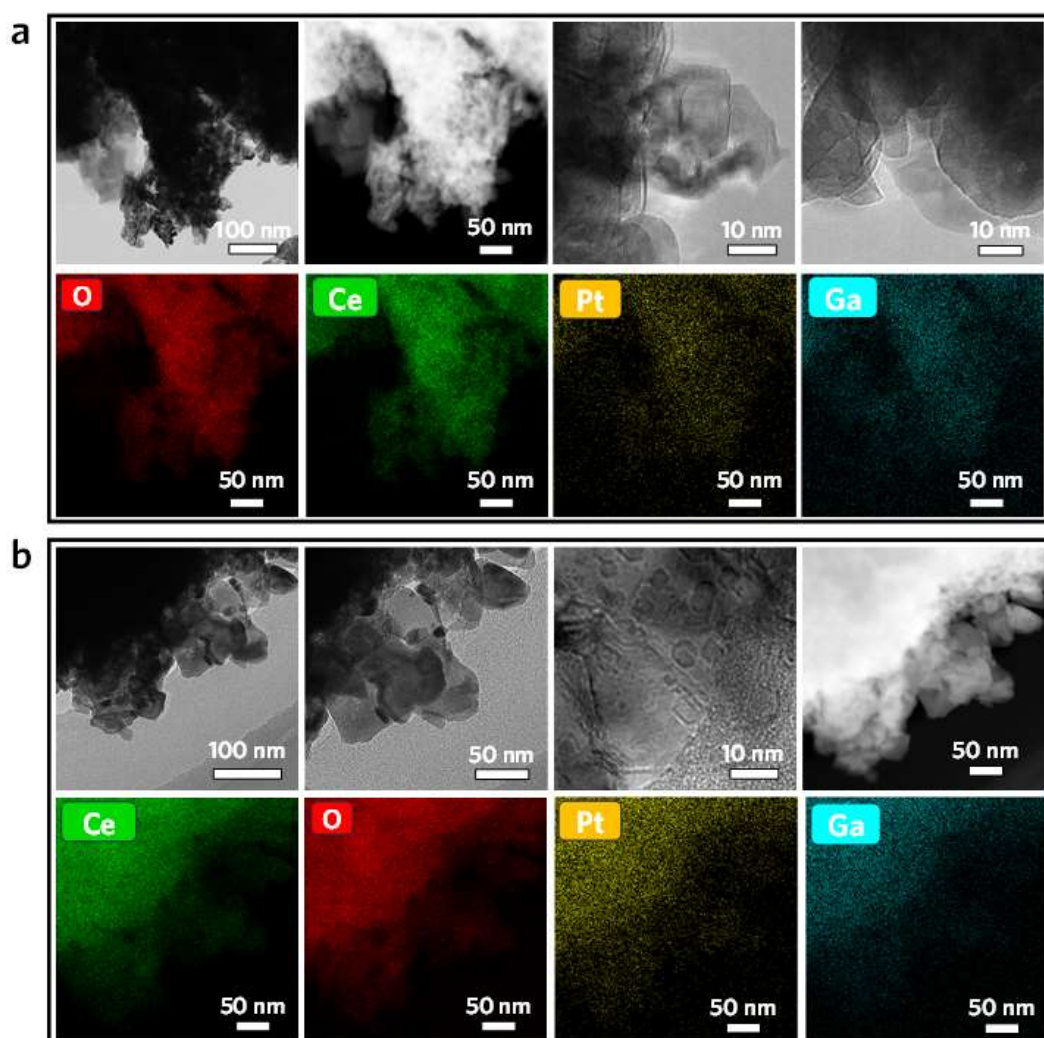

**Figure S18.** (a-b) The TEM images and corresponding elements Mapping of Pt1Ga0.5/CeO<sub>2</sub> before and after CO<sub>2</sub>-ODP reaction.

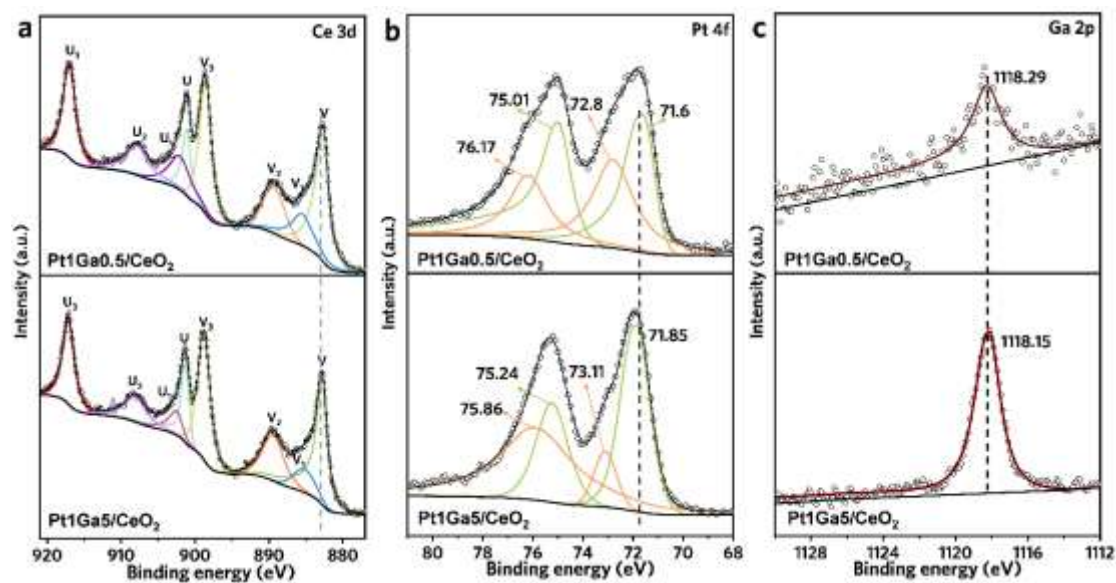

**Figure S19.** (a-e) The Ce 3d, Pt 4f, Ga 2p XPS of Pt1Ga0.5/CeO<sub>2</sub> and Pt1Ga5/CeO<sub>2</sub>.

**Table S1.** The amount of Pt and scattered rare metals in catalysts.

| Catalysts                 | Pt content (wt%) | Ga content (wt%) | In content (wt%) | Sn content (wt%) |
|---------------------------|------------------|------------------|------------------|------------------|
| Pt1/CeO <sub>2</sub>      | 1.09             | -                | -                | -                |
| Pt1Ga0.3/CeO <sub>2</sub> | 1.06             | 0.31             | -                | -                |
| Pt1Ga0.5/CeO <sub>2</sub> | 1.08             | 0.49             | -                | -                |
| Pt1Ga0.7/CeO <sub>2</sub> | 0.97             | 0.68             | -                | -                |
| Pt1Ga1/CeO <sub>2</sub>   | 0.94             | 0.96             | -                | -                |
| Pt1Ga3/CeO <sub>2</sub>   | 0.96             | 3.12             | -                | -                |
| Pt1Ga5/CeO <sub>2</sub>   | 0.99             | 5.2              | -                | -                |
| Pt1In3/CeO <sub>2</sub>   | 1.28             | -                | 3.10             | -                |
| Pt1Sn3/CeO <sub>2</sub>   | 0.93             | -                | -                | 2.97             |

**Table S2.** The summary of the pore structure of catalysts.

| <b>Samples</b>        | <b>S<sub>BET</sub><sup>a</sup><br/>(m<sup>2</sup>/g)</b> | <b>M<sub>BET</sub><sup>b</sup><br/>(m<sup>2</sup>/g)</b> | <b>E<sub>BET</sub><sup>c</sup><br/>(m<sup>2</sup>/g)</b> | <b>Adsorp. pore<br/>diameter(nm)</b> | <b>Desorp. pore<br/>diameter(nm)</b> |
|-----------------------|----------------------------------------------------------|----------------------------------------------------------|----------------------------------------------------------|--------------------------------------|--------------------------------------|
| CeO <sub>2</sub>      | 14.9                                                     | 0.2                                                      | 14.7                                                     | 4.1                                  | 3.5                                  |
| Pt/CeO <sub>2</sub>   | 13.8                                                     | 0.03                                                     | 13.7                                                     | 3.7                                  | 3.2                                  |
| PtGa/CeO <sub>2</sub> | 13.1                                                     | 0                                                        | 13.7                                                     | 3.9                                  | 3.4                                  |
| PtIn/CeO <sub>2</sub> | 12.3                                                     | 0                                                        | 12.5                                                     | 4.1                                  | 3.5                                  |
| PtSn/CeO <sub>2</sub> | 12.5                                                     | 0                                                        | 12.7                                                     | 3.9                                  | 3.4                                  |

a

Surface area, derived from BET equation;

b

Micropore area, derived from BET equation;

c

External surface area, derived from BET equation.
